# Supplementary material for: Epithelial cells release adenosine to promote local TNF production in response to polarity disruption
Source: PubMed Central journal article supplement (PMC6220285; doi:10.1038/s41467-018-07114-z), 2018-11-07
Supplement: 41467_2018_7114_MOESM1_ESM.pdf [file 41467_2018_7114_MOESM1_ESM.pdf]

## Supplementary Information for

### **Epithelial cells release adenosine to promote local TNF production in response to polarity disruption**

Poernbacher<sup>1\*</sup> et al.

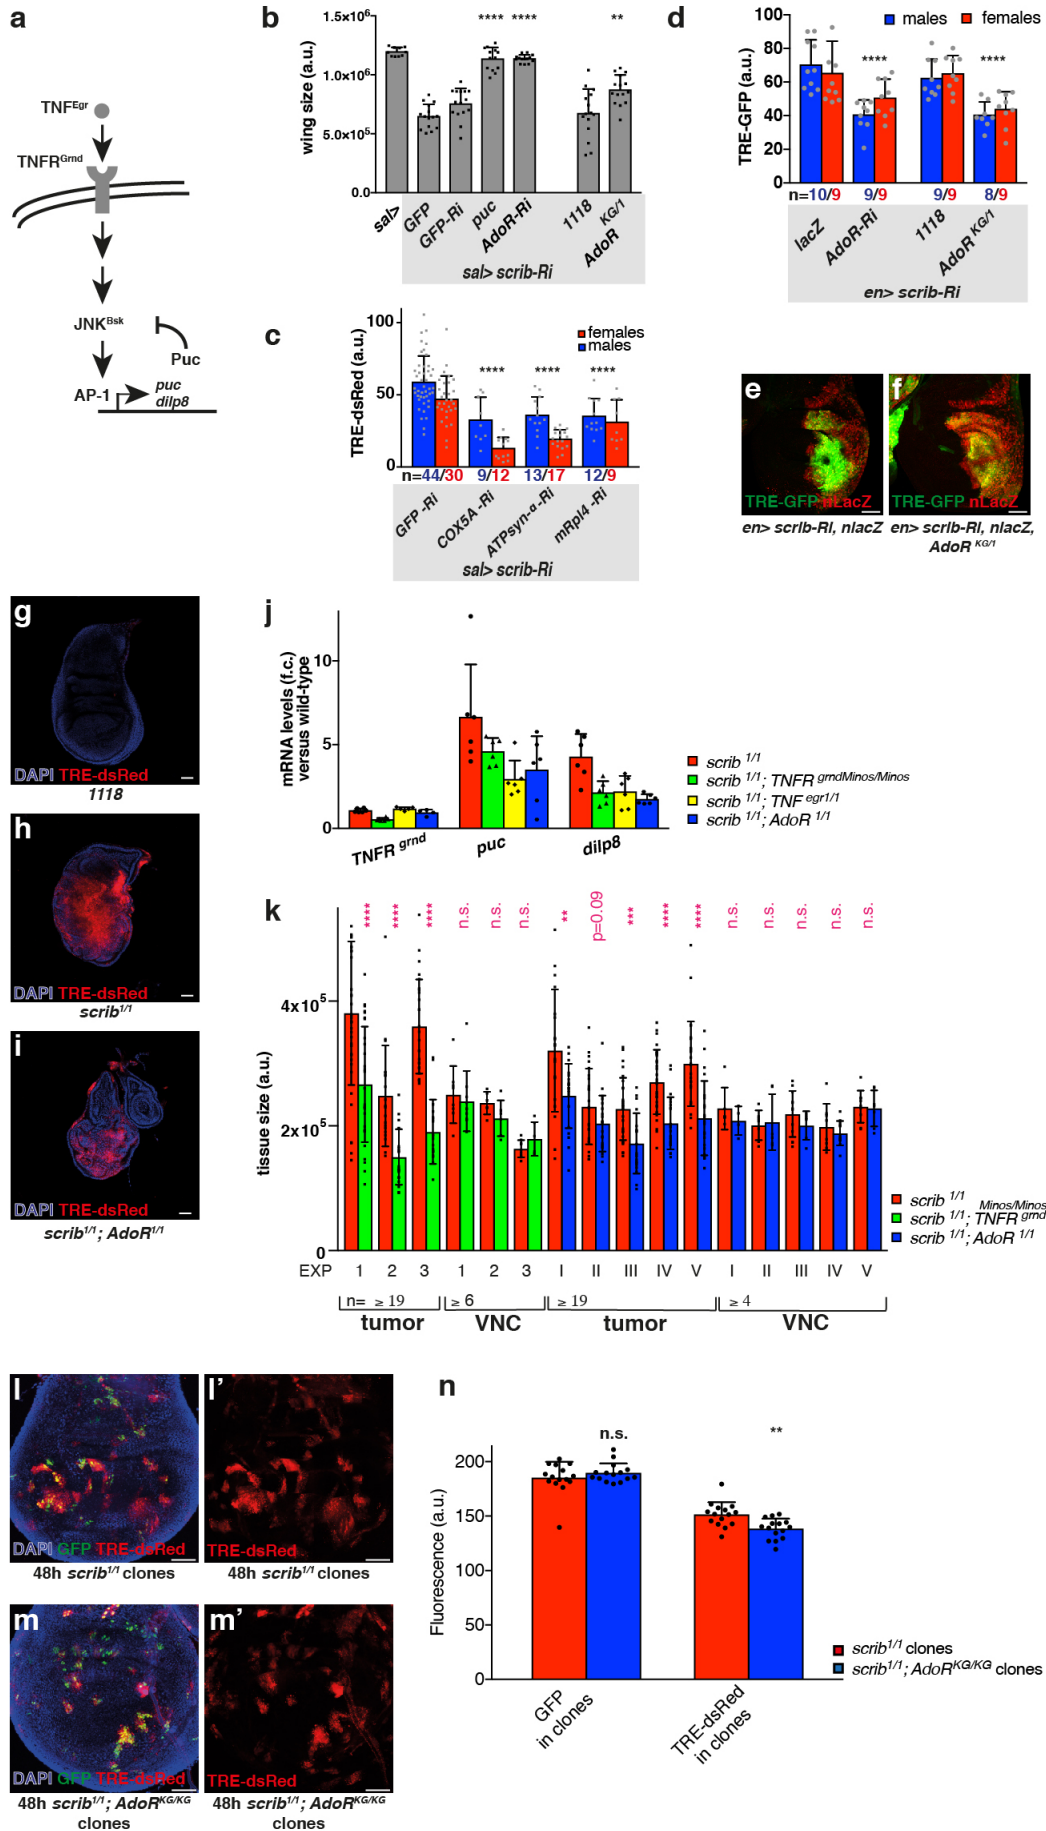

## Supplementary Fig. 1

### AdoR signalling boosts JNK activation in *scrib* tumors but has only a very mild effect on *scrib* mutant clones.

(a) *Drosophila* TNF/JNK signalling.

(b) Surface area of wings obtained from male flies of the indicated genotypes. Reduced size correlates with increased melanisation and crumpling ( $n \geq 13$ ).

(c) Knockdown of *ATP synthase*, *Cox5A* or *mRpL5* suppresses JNK signalling in *sal > scrib-Ri* discs.

(d-f) Depletion of *AdoR*, by RNAi or by mutation, reduces *TRE-GFP* activity in *en > scrib-Ri* discs.

(g-k) Wing discs from homozygous *scrib* mutant larvae activate *TRE-dsRed* (g, h) and upregulate the JNK target genes *puc* and *dilp8* (j). *TNFR<sup>gmd</sup>* expression, measured by RT-qPCR, is shown as a control. Fold changes are relative to *rp49*,  $n=6$ . Impairment of  $TNF^{Egr}$  or  $TNFR^{Gmd}$  (*TNF<sup>Egr</sup> scrib* or *TNFR<sup>gmd</sup> scrib* double mutants) partially reduces JNK target gene expression (j) and tumor size (k). Here, the size of the ventral nerve cord (VNC) is used as an internal control (k). Similar effects are seen in *scrib AdoR* double mutant discs (i-k).

(l-n) *scrib* mutant clones activate *TRE-dsRed*. In *scrib AdoR* double mutant clones *TRE-dsRed* activity is slightly, albeit significantly, reduced. The graph in (n) represents quantifications of GFP and *TRE-dsRed* fluorescence from all the clones present in each of  $n=15$  female wing discs for each genotype.

Scale bars, 50  $\mu$ m. In graphs, means are shown, and error bars represent  $\pm$ SD. \*\* $P < 0.01$ ,

\*\*\*  $P < 0.001$ , \*\*\*\*  $P < 0.0001$ , unpaired two-tailed Student's t-test.

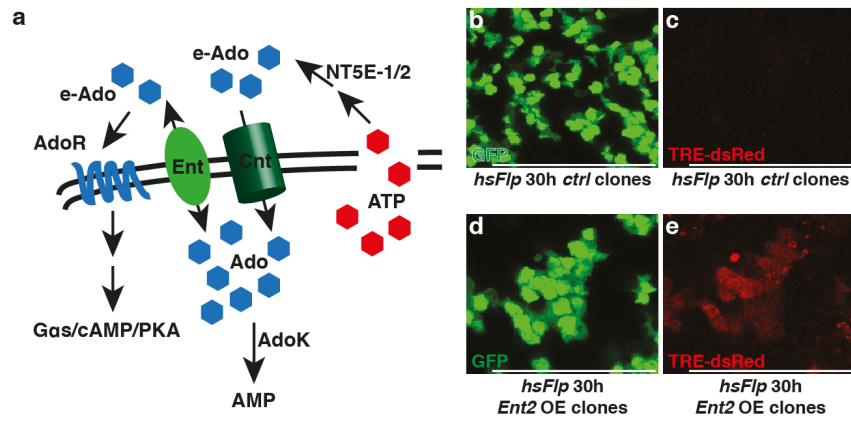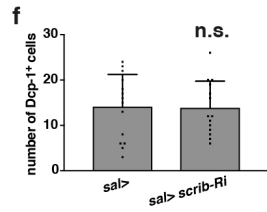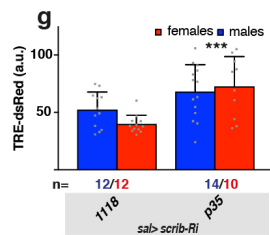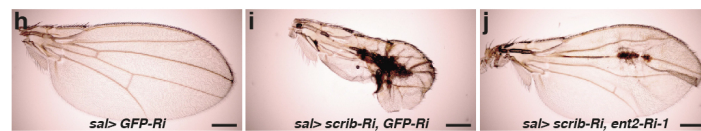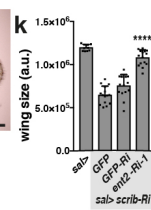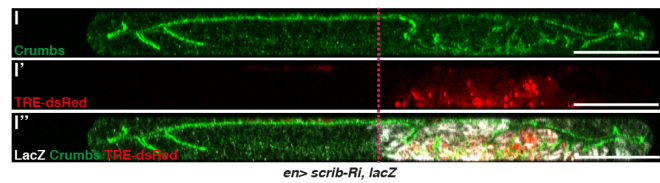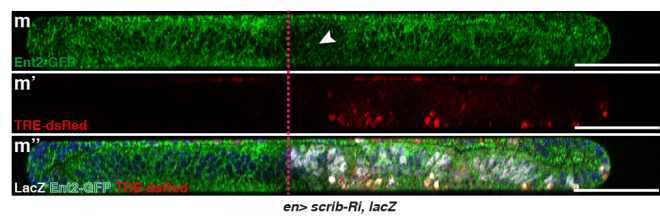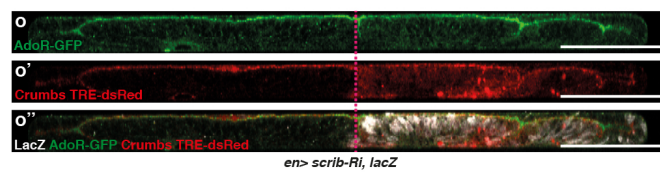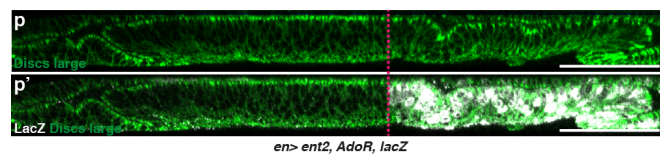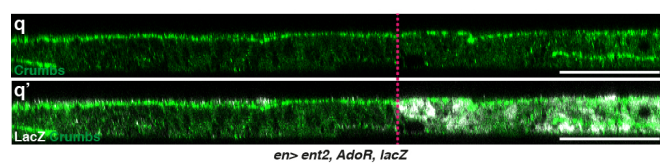

## Supplementary Fig. 2

### e-Ado signals in an autocrine manner and localisation of AdoR or Ent2 protein.

(a) Key regulators of e-Ado and purinergic signalling.

(b-e) Ent2-overexpressing clones activate *TRE-dsRed* cell-autonomously. Clones are marked by co-expression of GFP.

(f) Quantification of cells that are positive for the apoptosis marker Dcp-1 in the *sal*> domain of male wing discs of the indicated genotypes (n=14).

(g) Overexpression of p35, an inhibitor of apoptosis, does not reduce JNK signalling in *sal*> *scrib-Ri* discs.

(h-k) Knockdown of *ent2* partially rescues the defects of *sal*> *scrib-Ri* male wings (in k n≥14).

(l) *en*> *scrib Ri* discs have disrupted polarity in the posterior compartment (right side of pink line).

(m, o) *scrib* knockdown does not affect the levels or localization of Ent2-GFP expressed from a genomic fosmid (m) or of endogenously tagged AdoR-GFP (o). White arrowheads in (m) and (n) indicate a suspected position effect at the attP site (VK00033) where the fosmid was integrated. Both preparations are stained with anti-GFP antibodies.

(p, q) Overexpression of Ent2/AdoR in the posterior compartment (with *en*-Gal4) does not affect the distribution of epithelial polarity markers Discs large (p) and Crumbs (q).

Confocal images in (l-q) are cross-section xz views with posterior to the right and apical up. The A/P boundary is marked by a dotted pink line.

Scale bars, 50  $\mu$ m (b-e, l-q) and 0.5 mm (h-j). In graphs means are shown, and error bars represent  $\pm$ SD. \*\*\*\*  $P < 0.0001$ , \*\*\*  $P < 0.001$ , unpaired two-tailed Student's t-test. In (k) the effect of 'ent2-Ri' was compared to that of 'GFP-Ri' for statistical analysis.

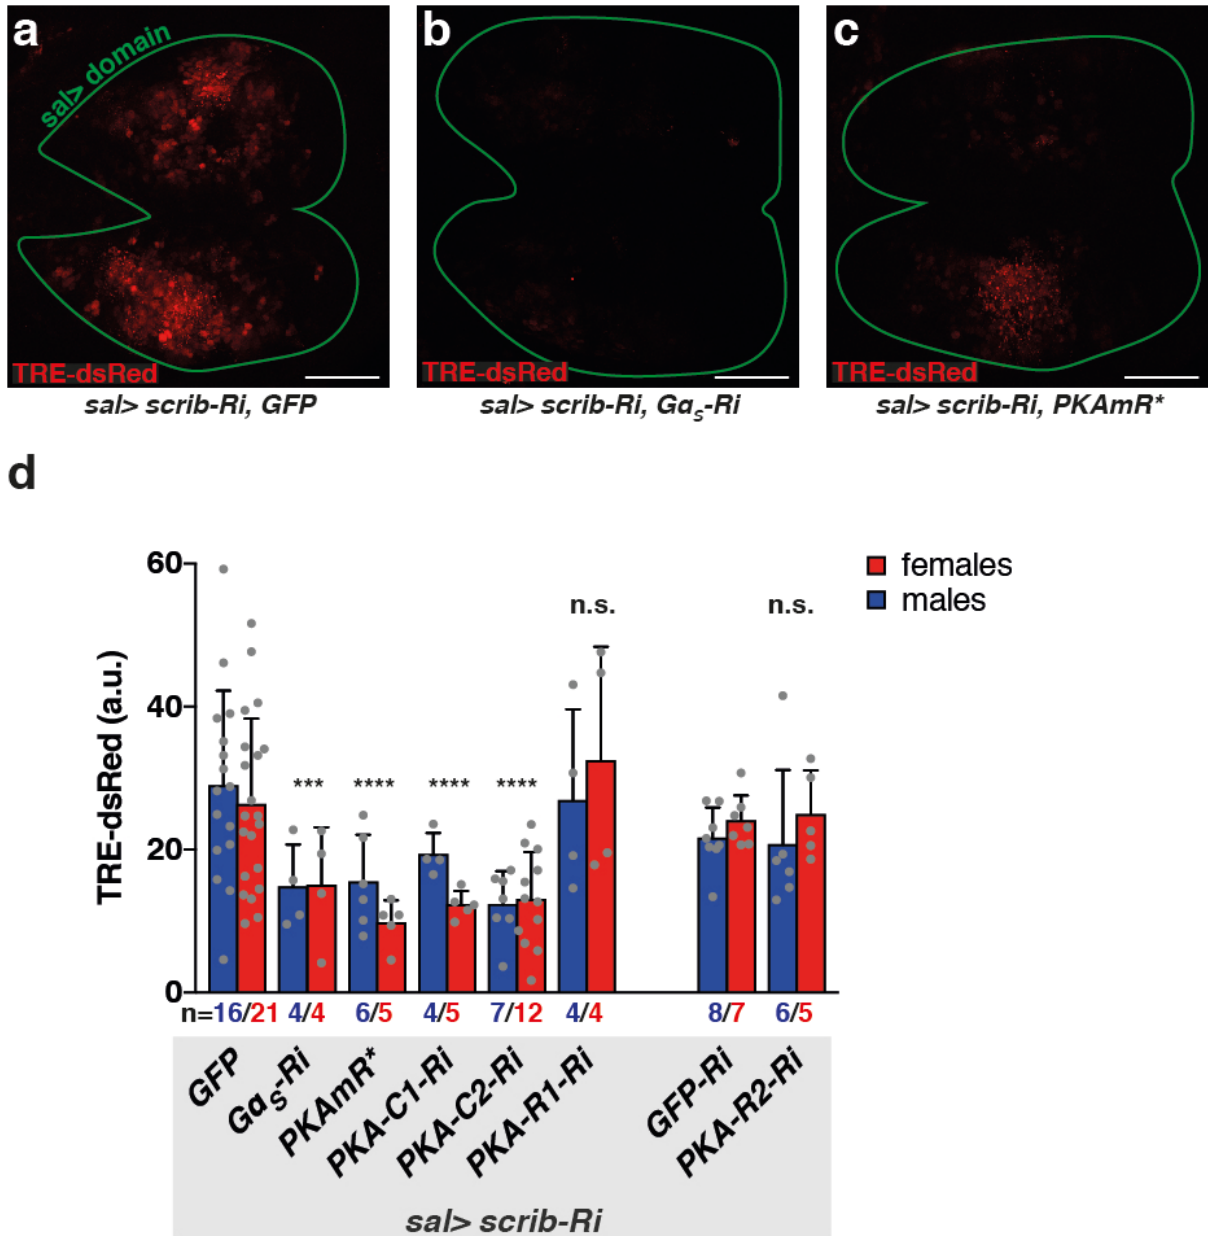

**Supplementary Fig. 3**

**Gα<sub>s</sub>/cAMP/PKA signalling is required for JNK activation in *scrib* deficient discs.**

(a-d) *Gα<sub>s</sub>-RNAi*, dominant negative PKA (*PKAmR\**), or *PKA-C-RNAi* reduce *TRE-dsRed* expression in *sal> scrib-Ri* discs. Knockdown of *PKA-R1* or *PKA-R2*, which is expected to increase PKA activity, was used as a control.

Scale bars, 50 μm. In graphs, means are shown, and error bars represent ±SD; \*\*\* *P* < 0.001,

\*\*\*\**P* < 0.0001, unpaired two-tailed Student's t-test (males and females pooled together).

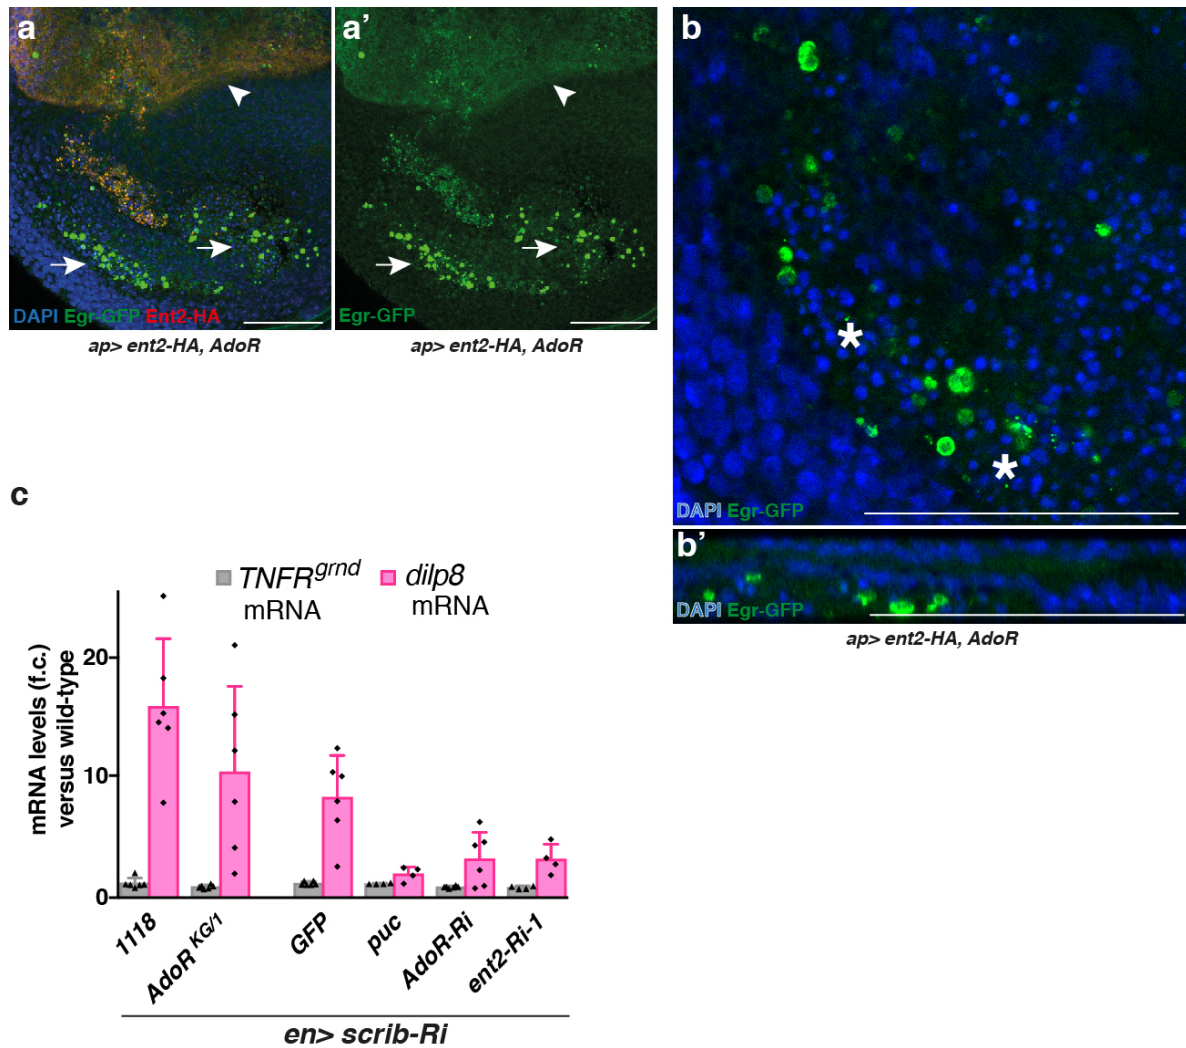

#### Supplementary Fig. 4

#### AdoR-mediated Egr expression in the disc epithelium does not arise from immune cells.

(a, b) As shown in Fig. 4c, overexpression of Ent2/AdoR with *sal*-Gal4 triggers expression of Egr-GFP within the epithelium without the involvement of recruited macrophages.

Overexpression of Ent2/AdoR with the stronger *apterous*-Gal4 (*ap*-Gal4) also induces epithelial Egr-GFP expression (arrowheads in a). Because of the strong activation of JNK signalling, it additionally causes significant apoptosis, as evidenced by the presence of cellular debris, which are known to attract macrophages (asterisks in b). Therefore *ap*-Gal4 > *ent2*, *AdoR* discs provide a situation where epithelial expression of TNF<sup>Egr</sup> (arrowheads) and macrophage recruitment (arrows) can be seen, and distinguished, in the same preparation.

The distinct morphology of macrophages (small round cells that are Egr-GFP positive) can be seen at high magnification in panel b.

Scale bars are 50  $\mu\text{m}$  (a) and 100  $\mu\text{m}$  in (b).

(c) *en> scrib Ri* discs upregulate JNK target *dilp8* mRNA in an AdoR/Ent2-dependent and JNK-dependent fashion. *TNFR<sup>grnd</sup>* expression, measured by RT-qPCR, is shown as a control.

Fold changes are relative to *rp49*,  $n \geq 4$ .
